# Supplementary material for: Early restrictive fluid balance is associated with lower hospital mortality independent of acute disease severity in critically ill patients on CRRT
Source: PubMed Central journal article supplement (PMC8440636; doi:10.1038/s41598-021-97888-y), 2021-09-14

## **Supplemental Figure S2. Association between cumulative fluid balance and time to CRRT initiation from ICU admission.**

The figure was generated using JMP Pro 15.1.0 software. Copyright 2019 © SAS Institute Inc. JMP Pro and all other SAS Institute Inc. product or service names are registered trademarks or trademarks of SAS Institute Inc., Cary, NC, USA.

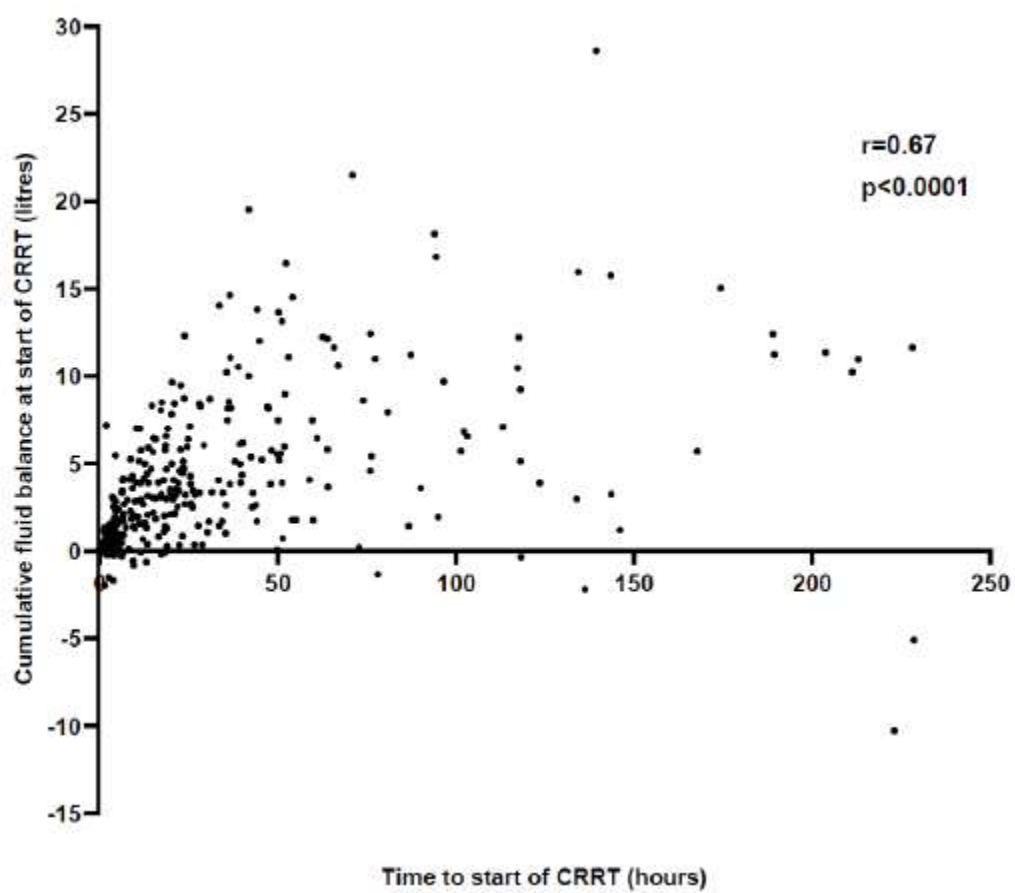

Supplement: 41598_2021_97888_MOESM2_ESM.pdf [file 41598_2021_97888_MOESM2_ESM.pdf]
